# Supplementary material for: Pasteur's quasiracemates in 2D: chiral conflict between structurally different enantiomers induces single-handed enantiomorphism
Source: Royal Society of Chemistry journal article supplement (doi:10.1039/c0cc03060k), 2010-01-01
Supplement: c0cc03060k.pdf [file c0cc03060k.pdf]

Supplementary Information

**Pasteur's quasiracemates in 2D: chiral conflict between structurally different enantiomers induces single-handed enantiomorphism**

Christian Roth, Daniele Passerone and Karl-Heinz Ernst\*

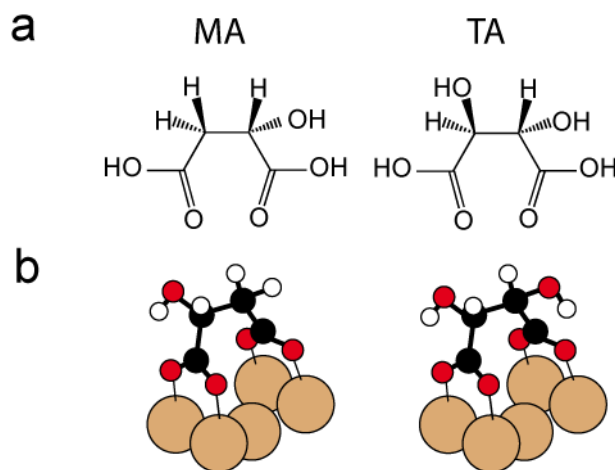

**Supplementary Information Figure 1.** Adsorption modes of tartaric acid and malic acid on Cu(110). (a) Structural formulas for (*S*)-malic acid (MA) and (*S,S*)-tartaric acid (TA). (b) Sketches for bimalate (left) and bitartrate (right) in the adsorbed state.

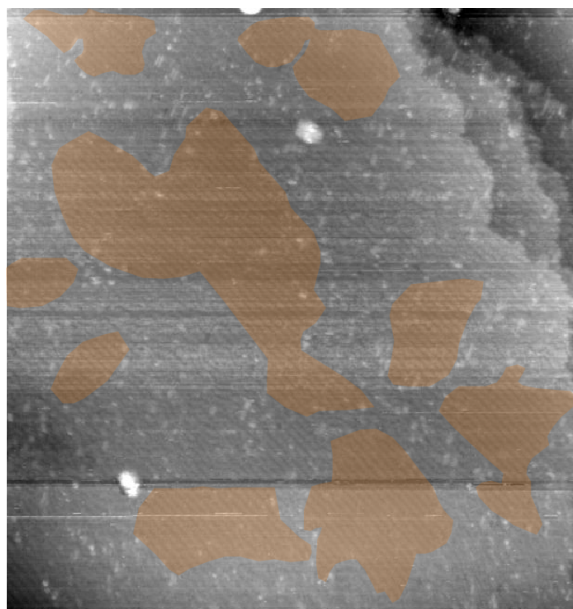

**Supplementary Information Figure 2.** Long-range STM scan (180 nm × 190 nm,  $U = -1930$  mV,  $I = 65$  pA). About 33% of the surface is covered with (1 2, -9 0) domains (orange).

\* e-mail: karl-heinz.ernst@empa.ch

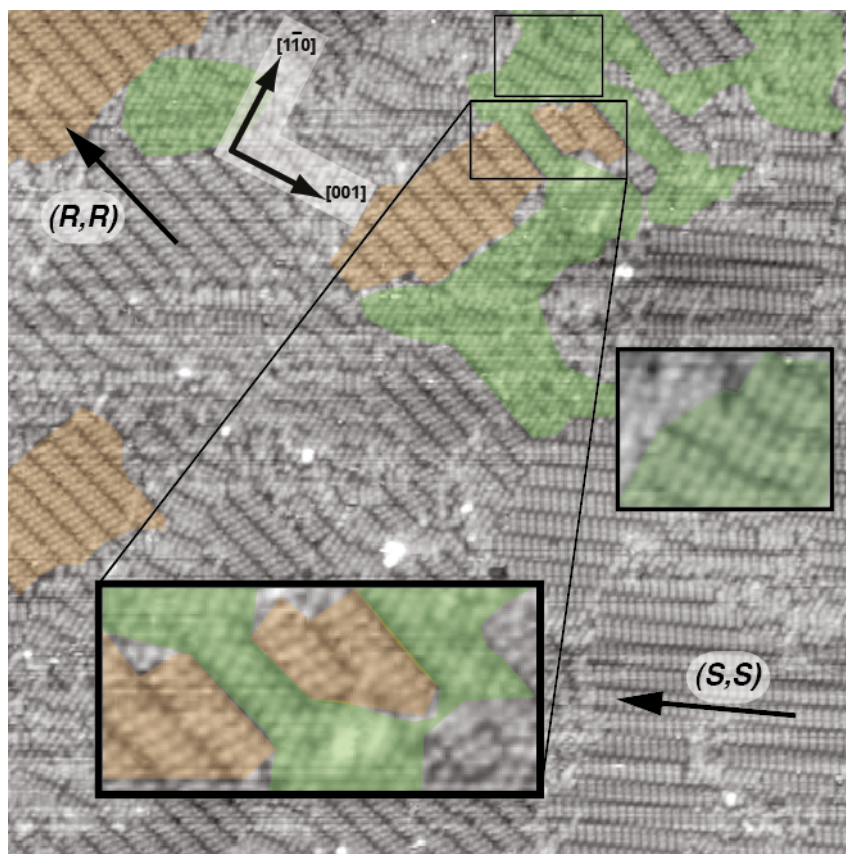

**Supplementary Information Figure 3.** STM image (70 nm × 70 nm, U = - 2 V, I = 50 pA) showing the coexistence of all phases at a ratio of 90% *rac.*-TA to 10% (*R*)-MA. The (*S,S*)-TA domains are still of substantial size. Some of the (*R,R*)-TA areas are coloured in orange. Triplets in the enantiopure (1 2, -9 0) domains are aligned along the  $[1 \bar{1} 0]$  direction, i.e. the trimer rows run parallel to the  $[1 \bar{1} 4]$  direction. The green areas show examples where the molecules are aligned along the  $[1 \bar{1} 0]$  direction. The insets show the presence of triplets in the green areas, one row going through a (1 2, -9 0) island.

### DFT calculations

For DFT modelling we used a Gaussian plane wave (GPW) approach as implemented in the code cp2k in the local density approximation (LDA). The electron-ion interaction was described by the norm-conserving pseudo-potentials of Goedecker-Teter-Hutter (GTH) and we used a TZV2P basis set for all elements of the molecule, and DZVP basis sets for the copper atoms; all bases are optimized for molecular and condensed phase systems. Our Cu(110) was modelled with 4 layers of 24 atoms each. Only the top line was allowed to relax during our geometry optimizations. A vacuum region of 20 Å was included in the direction orthogonal to the surface, and full periodic boundary conditions were adopted
